# Supplementary material for: Dominant negative variants in CUL1 of the ubiquitin-proteasome cause a neurodevelopmental syndrome
Source: Research Square preprint supplement (doi:10.21203/rs.3.rs-7745906/v1), 2025-10-05
Supplement: Supplementary file 1 [file 9b6250ba674d0f2f4b8ff9b3.xlsx]

## Sheet: Sheet1
Table S1. Extended phenotypic data of affected indiviuduals with CUL1 variants
Indv #	1	2	3	4	5	6	7	8	9	10
Genomic test done	research trio exome (after negative clinical exome)	trio exome	clinical trio exome	trio exome	trio exome	research trio exome	trio exome	trio exome	exome	clinical trio genome
Variant details NM_003592.3	c.1693C>T, p.(Arg565*)	c.2011T>G, p.(Leu671Val)	c.1620_1624dup, p.(Ser542*)	c.790-2A>G, p.(?)	c.1533dup, p.(Gly512Trpfs*51)	c.2137G>A, p.(Ala713Thr)	c.1543A>G, p.(Lys515Glu)	c.1627G>A, p.(Gly543Arg)	c.1214dup, p.(Asn405Lysfs*13)	c.1513C>T, p.(Gln505*)
Type of inheritance	De novo	De novo	De novo	De novo	De novo	De novo	De novo	De novo	unknown, mother unavailable for sequencing	De novo
Ethnicity	Caucasian	Caucasian (German)	Caucasian and Native American	F:Italy-M:Brasil	Caucasian	Russian	Caucasian (Belgium)	Caucasian	Caucasian
Gender	female	female	female	female	male	male	male	female	male	male
Current age (year)	21 yo	7 y 11 m	7 yo	11y and 7 months	1 yo	5.5 yo	7 yo	12 yo	10 yo	11 yo
Pregnancy complication	placental previa, nuchal cord	none	breech position	none	Twin lost at 12 weeks of pregnancy	left side congenital diaphragmatic hernia by ultrasound	none	none	none	none
Gestation (weeks)	38	40.7143	40	41	term	41.1429	40	38	post-term	NA
Delivery	spontaneous delivery	spontaneous delivery	scheduled cesarean, uncomplicated	caesarean section	Emergency caesarean section for breech, fetal distress, oligohydramnios. Respiratory distress treated with mask oxygen overnight.	caesarean section	spontaneous delivery	sponatenous delivery	spontaneous delivery	cesarean section
Birth weight (kg)	2.92 kg (43%, Z=-0.18)	4.135 kg (88%, Z=1.19)	2.92 kg (24.10%, Z=-0.70)	3.430 kg (40%, Z=-0.25)	4.05 kg (84%, Z=1.00)	2.850 kg (6%, Z=-1.56)	unknown, but normal range	2.800 kg (19%, Z=-0.89)	3.46 kg (40%, Z=-0.26)	unknown, but normal range
Birth OFC (cm)	unknown	33 cm (6%, Z=-1.52)	unknown	35 cm (44%, Z=-0.15)	unknown	33 cm (4%, Z=-1.71)	unknown, but normal range	not recorded	unknown	unknown, but normal range
Birth length (cm)	unknown	50 cm (46%, Z=-0.10)	unknown	50 cm (46%, Z=-0.10)	50.8 cm (60%, Z=0.24)	52 cm (56%, Z=0.15)	unknown, but normal range	46 cm (33%, Z=-0.3)	54 cm (93%, Z=1.46)	unknown, but normal range
Apgar scores at 1 and 5 min	unknown	9/10	unknown	8/9	8/9	6/8	unknown	8/10	unknown	unknown
Age at last evaluation	20 yo	7y 9m	15 months	7 years and 10 months	12 months	21 months	7 years 1 month	8 years 8 months	10 years	9 years 11 months
Weight at last examination	59.1 kg (62%)	27.2 kg (61%, Z=0.27)	9.5 kg (42%, Z=-0.20)	29 kg (50%, Z=0)	N/A	9.1 kg (1%, Z=-2.25)	20 kg (13%, Z=-1.13)	49 kg (99%, Z=2.36)	N/A	Z=2.72
Height at last examination	157.4 (19%)	125.3 cm (33%, Z=-0.43)	75.5 cm (16%, Z=-0.98)	125 cm (25%, Z=-0.67)	N/A	83 cm (15%, Z=-1.04)	125 cm (69%, Z=0.50)	136.8 cm (71%, Z=0.54)	N/A	Z=2.11
Head circumference at last examination	56.3 cm (70%) at 18 yo	47.4 cm (<1%, Z=-3.95)	42 cm (0.01%) 15 months	52 cm (50%, Z=0)	48 cm (Z=1.30)	46.5 cm (1%, Z=-2.26), at 21 m	51.5 cm (37%, Z=-0.34)	54.5 cm (96%, Z=1.75)	N/A	Z=1.74
Microcephaly	no	yes	yes	no	no	yes	no	no	N/A	no
Feeding difficulties during neonatal period	none	none	none	none	none	none	none	none	none	none
Developmental delay	yes, mild speech delay	yes, speech and fine motor delay	yes, global developmental delay	yes, severe speech delay and mild motor delay	yes, mild/moderate motor, speech and social delay	yes, speech delay and mild motor delay	yes, mild speech and motor delay	yes, pronounced speech delay, motor delay	yes, mild motor and social delay	yes, global developmental delay
Intellectual disability	No	no, but learning difficulties with WPPSI-IV IQ of 70	no, but borderline with WISC-V IQ of 76	yes	N/A	no. WPPSI-IV IQ of 92	no	no	no	no, but learning difficulties
Gross motor delay	none	none	yes	none	yes, secondary to decreased global muscle tone	yes	yes	yes	yes	yes
Fine motor delay	none	yes, mild	yes	yes	yes, secondary to decreased global muscle tone	NA	yes, as a consequence of abnormal movements	no	NA	yes
Age at sitting (months)	on time	NA	13 months	9 months	9 months	8 months	NA	10-12 months	NA	NA
Age at walking (months)	15 months	13 month	15 months	16 months	not yet (combat crawl at 12 months)	20 months	18 months	18 m	NA	NA
Age of first words	2 yo	NA	12 months	he doesn't speak just a few syllables	not yet	9 months	Initial language delay (age not known)	18 m	NA	NA
Speech delay	By 2.5 yo, her family could only understand 10% of her language. This improved with speech therapy.	yes, expressive and receptive speech delay	yes	yes verbal and sign language absent	yes	yes, expressive speach delay	yes, Initial language delay, but progressive improvement in language and currently normal skills	yes, expressive and receptive speech delay, and verbal dyspraxia	NA	yes, expressive language delay and apraxia of speech
Receive speech therapy	speech therapy, OT, PT	yes; receives logopedia and ergotherapy	speech therapy, OT, PT	yes	yes	yes	yes	speech therapy, OT, PT	no	NA
Current speech/language capacities	There are no current concerns as speech is normal	speaks in full sentences, vocabulary and grammar not always correct or age-appropriate; omitting syllables, when speaking	verbal but delayed for age	absent	says 'mama' (nonspecific)	2-3 word sentences	Currently normal language	dyspraxia articulation difficulties	Currently normal language	NA
Autism	no	no	no	yes ASD level 3 DSM-5. Takes the drug: aripiprazol 10mg/day	suspected	No	No	no	no	no
ADHD/ADD	no	yes	yes	not yet	not at 1 yo	No	No	no	no formal diagnosis but traits	no
Other behavioural abnormalities	Depression and obsessive-compulsive disorder were diagnosed in the late teens/early 20s	no	impulsivity, hyperactivity, disruptive behavior, inattention, disorganization	hyperactivity	early difficulty with social connectedness; communication delay; early stereotypic behavior	No	No	low self esteem	impulse control issues, poor social skill	NA
Sensation differences (pain sensitivity etc.)	normal sensation and proprioception of her feet and legs bilaterally. There is longstanding heat intolerance.	NA	unknown	apparently none	not reported	Not known	Not known	no	yes, pain insensitivity	no
Hypotonia	trunk and limbs	no	yes, in infancy	mild	moderate/severe	no	initial hypotonia with delayed initial motor acquisition, then walking acquired at 18 months with help from a psychomotor therapist	truncal hypotonia	no	generalized hypotonia
Sleep disturbances	borderline obstructive sleep apnea with low sleep efficiency	problems with falling asleep, melatonin helps sufficiently	yes, takes clonidine for sleep	none	yes, wakes up every 2-3 hours	no (enuresis noctura)	no	no	no	NA
Seizures/epilepsy suspected	no	no	no	none	not yet tested (sometimes tremor of head during feeding)	no	No	no	no	NA
Brain MRI finding	No significant abnormalities seen on scans at ages 1, 2, and 6 years.	normal	normal	NA	corpus callosum hypoplasia with absent rostrum and diffuse thinning of the body; marked mucosal thickening in the paranal sinuses	NA	normal	normal	corpus callosum complete agenesis. Large anterior commissure. Colpocephaly	cerebellar tonsilar ectopia
Congenital abnormalities	PFO	macroglossia (related to Beckwith Wiedemann syndrome)	none	not reported	not reported	congenital diaphragmatic hernia (left side)	none	none	none	NA
Skeleton/limb abnormalities	frequent stress fractures, injuries	no	none	not reported	not reported	funnel chest	none	none	none	NA
Vision abnormalities	history of ptosis for one year in childhood, history of photosensitivity no longer a concern	Strabism divergens intermittens, hyperopia	none	not reported	not reported	not reported	Astigmatism, hypermetropia	wears glasses	optic nerve abnormal	NA
Hearing abnormalities	none	no	none	not reported	not reported	not reported	none	none	none	NA
Cardiac abnormalities	dilated inferior vena cava and patent foramen ovale	no	none suspected	not reported	none	patent ductus arteriosus with bidirectional shunt	none	not reported	none	NA
Gastrointestinal/nutrition abnormalities	There is longstanding GI dysmotility that has worsened overtime and is characterized by chronic nausea, chronic constipation, severe bloating, and severe reflux with esophagitis.	no	none	chronic constipation	GERD; chronic constipation	not reported	normal	normal	normal	NA
Urogenital abnormalities	normal	no	normal	not reported	not reported	not reported	normal	normal	normal	NA
Endocrine/metabolic abnormalities	lactic acidosis (resolved); dysmenorrhea with cycle every 3 weeks with severe pain, improved with OCP	no	normal	not reported	thassalemia minor	not reported	normal	normal	normal	NA
Immunologic abnormalities	normal	no	normal	not reported	yes	not reported	normal	normal	normal	NA
hand and feet abnormalities	tapered fingers, long second fingers bilaterally (same length as 3rd fingers), faint finger tip grooves, slender feet with long second toes, two palmar creases bilaterally, sandal gap	5th finger cliniodactyly, bilateral overriding toe No. 2	no	no	not reported	mild toes 2/3 syndactyly, overlapping toes 4/5 (seft side)	NA	tapering fingers	trigger finger	brachydactyly, pes planus
Dysmorphisms	ptosis (resolved), mildly deep-set eyes, hypertelorism (also in dad), broad nasal root, bulbous nasal tip, cafe au lait on her right forearm	Strabism divergens intermittens, deep-set eyes, epicanthus, short palpebral fissures, bulbous nasal tip, small chin, short neck	deep-set almond-shaped eyes, hooded eyelids, general with a PWS appearance	high forehead, deep-set eyes, thin eyebrows, anteverted nostrils, large columella, smooth philtrum, squared chin, high palate	open mouth with tongue partly protruded	high forehead, high anterior hairline, large ears, wide-spaced nipples	NA	almond shaped eyes, upslanting palpebral fissures. High and narrow palate	NA	deep-set eyes, upslanted palpebral fissure, broad and straight eyebrows, bulbous nose, full and everted lip, micrognathia, long ear
Movement disorder/concern	Tremor and clonus were noted in childhood but improved over time. Ataxia was noted with illness and other stressors and improved over time. There was difficulty with toe, heel, and tandem gait but ataxia was not noted in teens or early 20s	no	no	no	Excessive arching (started at 2 weeks old), scapular retraction, lower extremities stiffening. Poor coordination, weak flexion patters, considerable ataxia, dysmetria and central hpotonia. Torcicollis	No	progressive ataxia with impossibility of maintaining a unipodal station and the appearance of mild abnormal choreiform movements	atactic cerebral palsy, increased fatigability	NA	gait disturbance, decreased coordination
Ataxia	yes, resolved	no	no	no	yes	No	Early onset of progressive ataxia with impossibility of maintaining a unipodal station	yes	NA	balance issues
Tics	no	no	no	no	NA	No	No	no	NA	NA
Stereotypies	no	no	no	only in infancy	NA	No	No	no	NA	NA
Chorea	no	no	no	no	NA	No	Mild abnormal choreiform movement	no	NA	NA
Dystonia	no	no	no	no	NA	No	Yes	no	NA	NA
Myoclonus	no	no	no	no	NA	No	Yes	no	NA	NA
Tremor	yes	no	no	no	NA	No	No	no	NA	NA
Akinesia, rigidity	no	no	no	no	NA	No	No	no	NA	rigidity in the lower extremities, tight tendons
movement concern changed over time	yes, improved/resolved	no	no	no	NA	No	Yes	yes	NA	NA
Dysarthria	yes, with illness	no	no	no	NA	No	mild	yes	NA	yes
hyperreflexia	yes	no	yes, in early infancy	no	NA	No	No	yes	NA	NA
Babinski sign	no	no	NA	no	NA	No	No	yes	NA	NA
Spastic ataxia	no, resolved	no	no	no	NA	No	No	yes	NA	yes
nystagmus	no	no	no	no	NA	No	No	no	NA	NA
Other features/abnormalities/interesting observations	persistent fatigue, exercise intolerance, and muscle weakness; short stature relative to family; low ferritin, low iron stores	migraine	out-toeing gait	none	auditory/sensory processing differences	failure to thrive	Mild muscle weakness in all four limbs	none	none	tall stature
Other remarks	marked hypermobility, foot/ankle pronation impeding walking, frequent/easy joint dislocations	confirmed Beckwith Wiedemann syndrome and unexplained microcephaly (was not present at birth, but developed in early childhood without any reason). She has a mild developmental delay	developmental delay in mother and father; both proband and dad share similar features of microcephaly and dysmorphisms	none	none	none	none	none	none	none
