# Supplementary material for: Dominant negative variants in CUL1 of the ubiquitin-proteasome cause a neurodevelopmental syndrome
Source: Research Square preprint supplement (doi:10.21203/rs.3.rs-7745906/v1), 2025-10-05
Supplement: Supplementary file 2 [file e21df40e312ec4102fbfb89a.docx]

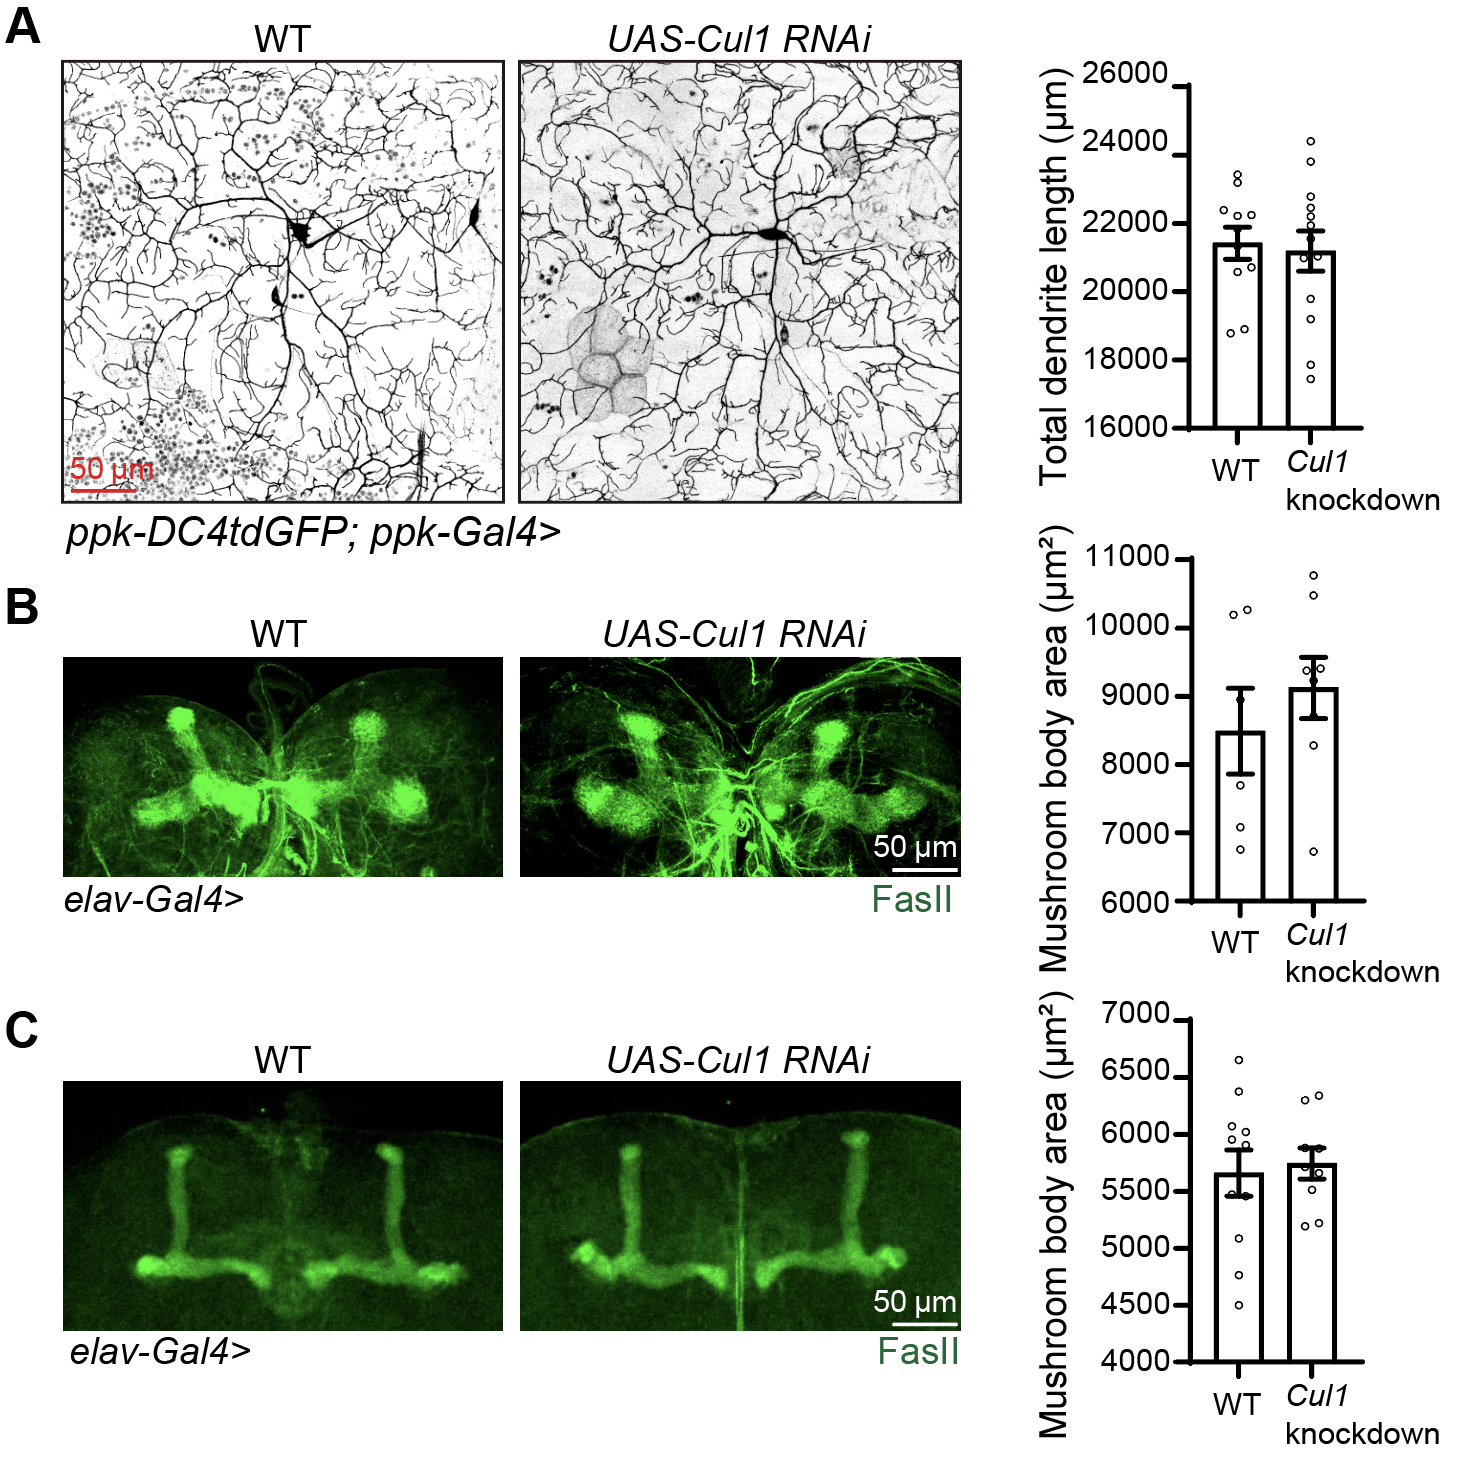
**Supplemental Figure 1.** **Cul1 knockdown did not lead to obvious neuron or MB morphological defects. (A)** C4da neuron total dendrite length is comparable between WT and *Cul1* knockdown. Analyzed by unpaired *t*-test. *n* = 11, 13 neurons. **(B and C)** MB morphology in *Cul1* knockdown is similar to WT at larval **(B)** and adult **(C)** stage. Larval stage: *n* = 6, 8, adult stage: *n* = 11, 9 brains. Analyzed by unpaired *t*-test. Scale bar, 50 μm.
